# Supplementary material
Source: publisher site journal article supplement (https://www.dovepress.com/get_supplementary_file.php?f=289714.docx)
Supplement: Supplementary file 1 [file get_supplementary_file.php]

**Supplementary materials**

Table S1 Summary of previous systematic review and meta-analysis

| Review | Review objective | Type of study included | Articles included | Finding |
| --- | --- | --- | --- | --- |
| Pasipanodya *et a.* 2012 | Association of isoniazid pharmacokinetic variability  with either microbiological failure or acquired drug resistance | Prospective,  Randomized controlled clinical trials | 1948 to December  2010 | Pharmacokinetic variability to isoniazid is significantly associated with failure of therapy and acquired drug resistance in patients. |
| Wilby *et al* 2014 | Association clinical outcome with achievement of target drug concentrations | Retrospective cohort, prospective cohort, case series case control, cross-sectional studies, and controlled PK study | MEDLINE (1948—August 2014), EMBASE  (1980—August 2014), International Pharmaceutical  Abstracts (1970—August 2014) | Data neither prove nor disprove the utility of therapeutic drug monitoring for general tuberculosis populations but evidence does not currently support routine measurement of drug concentrations. |
| Mota *et al* 2016 | Association of clinical and pharmacokinetic outcomes of subjects undergoing therapeutic drug monitoring with first-line anti-tuberculosis medications. | Cohort, Cross-sectional, case control, cross over and randomized clinical trial | 1970–March 2014 for databases | High proportion of patients  had 2 h drug concentrations below the accepted normal threshold. |
| Sekaggya-Wiltshire *et al* 2018 | It summarizes the literature that reports the association  between anti-TB drug concentrations and treatment outcomes in patients with pulmonary tuberculosis | Retrospective and prospective observational study, and case control | up to 31st June 2016 | Limited number of adequately powered  studies to show the association between anti-TB drug concentrations and treatment |
| R. Perumal *et al* 2020 | It searchs for available evidence on the association between first line TB drug concentrations in adult patients with drug sensitive TB and treatment outcome. And to compare WHO-defined treatment outcomes between patients with therapeutic and  low first-line drug serum concentrations. | Retrospective and prospective observational study, Randomized  controlled trial | From each database inception to 31 March 2018 | Low PZA concentration probably increases the risk of poor outcomes; low RMP concentration may slightly increase the risk of poor outcome; whereas low concentrations of INH and EMB make no clear difference to treatment  outcomes, when assessed using the dichotomous range of low or therapeutic concentrations of these drugs. |

Table S2 PRISMA Checklist

PRISMA checklist of Items to Include When Reporting A Systematic Review

The impact of first-line anti-tubercular drugs’ pharmacokinetics on treatment outcome: a systematic review

| Section/Topic | Item # | Checklist Item | Reported on Page # |
| --- | --- | --- | --- |
| TITLE | | | |
| Title | 1 | Identify the report as a systematic review, meta-analysis, or both | 1 |
| ABSTRACT | | | |
| Structured summary | 2 | Provide a structured summary including, as applicable: background; objectives; data sources; study eligibility criteria, participants, and interventions; study appraisal and synthesis methods; results; limitations; conclusions and implications of key findings; systematic review registration number. | 2 |
| INTRODUCTION | | | |
| Rationale | 3 | Describe the rationale for the review in the context of what is already known | 3-4 and S1 |
| Objectives | 4 | Provide an explicit statement of questions being addressed with reference to participants, interventions, comparisons, outcomes, and study design (PICOS). | 3-4 |
| METHODS | | | |
| Protocol and registration | 5 | Indicate if a review protocol exists, if and where it can be accessed (e.g., Web address), and, if available, provide  registration information including registration number.  *Available https://www.crd.york.ac.uk/prospero/display_record.php?ID=CRD42019138544* | 5 |
| Eligibility criteria | 6 | Specify study characteristics (e.g., PICOS, length of follow-up) and report characteristics (e.g., years considered, language, publication status) used as criteria for eligibility, giving rationale. | 5 |
| Information sources | 7 | Describe all information sources (e.g., databases with dates of coverage, contact with study authors to identify additional studies) in the search and date last searched. | 5 |
| Search | 8 | Present full electronic search strategy for at least one database, including any limits used, such that it could be repeated. | 5 |
| Study selection | 9 | State the process for selecting studies (i.e., screening, eligibility, included in systematic review, and, if applicable, included in the meta-analysis). | 5-6 |
| Data collection process | 10 | Describe method of data extraction from reports (e.g., piloted forms, independently, in duplicate) and any processes for obtaining and confirming data from investigators. | 6 |
| Data items | 11 | List and define all variables for which data were sought (e.g., PICOS, funding sources) and any assumptions and simplifications made. | 6 |
| Risk of bias in individual studies | 12 | Describe methods used for assessing risk of bias of individual studies (including specification of whether this was done at the study or outcome level), and how this information is to be used in any data synthesis. | 6 |
| Summary measures | 13 | State the principal summary measures (e.g., risk ratio, difference in means). | N/A |
| Synthesis of results | 14 | Describe the methods of handling data and combining results of studies, if done, including measures of consistency (e.g., I2) for each meta-analysis. | N/A |
| Risk of bias across studies | 15 | Specify any assessment of risk of bias that may affect the cumulative evidence (e.g., publication bias, selective reporting within studies). | 6 |
| Additional analyses | 16 | Describe methods of additional analyses (e.g., sensitivity or subgroup analyses, meta-regression), if done, indicating which were pre-specified. | N/A |
| RESULTS | | | |
| Study selection | 17 | Give numbers of studies screened, assessed for eligibility, and included in the review, with reasons for exclusions at each stage, ideally with a flow diagram. | 6-7 |
| Study characteristics | 18 | For each study, present characteristics for which data were extracted (e.g., study size, PICOS, follow-up period) and provide the citations. | 7-8 |
| Risk of bias within studies | 19 | Present data on risk of bias of each study and, if available, any outcome level assessment (see item 12). | 8 |
| Results of individual studies | 20 | For all outcomes considered (benefits or harms), present, for each study: (a) simple summary data for each intervention group (b) effect estimates and confidence intervals, ideally with a forest plot. | 8-12 |
| Synthesis of results | 21 | Present results of each meta-analysis done, including confidence intervals and measures of consistency. | N/A |
| Risk of bias across studies | 22 | Present results of any assessment of risk of bias across studies (see Item 15). | N/A |
| Additional analysis | 23 | Give results of additional analyses, if done (e.g., sensitivity or subgroup analyses, meta-regression [see Item 16]). | N/A |
| DISCUSSION |  |  |  |
| Summary of evidence | 24 | Summarize the main findings including the strength of evidence for each main outcome; consider their relevance to key groups (e.g., healthcare providers, users, and policy makers). | 14-15 |
| Limitations | 25 | Discuss limitations at study and outcome level (e.g., risk of bias), and at review-level (e.g., incomplete retrieval of identified research, reporting bias). | 15 |
| Conclusions | 26 | Provide a general interpretation of the results in the context of other evidence, and implications for future research. | 16 |
|  | | | |
| Funding | 27 | Describe sources of funding for the systematic review and other support (e.g., supply of data); role of funders for the systematic review. | 16 |

Note:- N/A =non-applicable. This is a qualitative systematic review and no results was pooled and analysised. PRISMA figure adapted from Liberati A, Altman D, Tetzlaff J, et al. The PRISMA statement for reporting systematic reviews and meta-analyses of studies that evaluate health care interventions: explanation and elaboration. *Journal of clinical epidemiology*. 2009;62(10). Creative Commons.

Table S3 Risk of bias assessment for controlled clinical trials

| Domain | Explanation | Result (  yes/no) | Expected answer | Risk of bias  Judgment |
| --- | --- | --- | --- | --- |
| Risk of bias arising from the randomization process | Was the allocation sequence random? |  | Y |  |
| Was the allocation sequence concealed until participants were enrolled and assigned to interventions? |  | Y |
| Did baseline differences between intervention groups suggest a problem with the randomization process? |  | N |
| Risk of bias due to deviations from the intended interventions (effect of assignment to intervention) | Were participants aware of their assigned intervention during the trial? |  | N |  |
| Were carers and people delivering the interventions aware of participants' assigned intervention during the trial? |  | N |
| Was an appropriate analysis used to estimate the effect of assignment to intervention? |  | Y |
| Risk of bias due to deviations from the intended interventions (effect of adhering to intervention) | Were participants aware of their assigned intervention during the trial? |  | N |  |
| Were carers and people delivering the interventions aware of participants' assigned intervention during the trial? |  | N |
| Was an appropriate analysis used to estimate the effect of adhering to the intervention? |  | Y |
| Outcome measure bias | Were data for this outcome available for all, or nearly all, participants randomized? |  | Y |  |
| Risk of bias in measurement of the outcome | Was the method of measuring the outcome inappropriate? |  | Y |  |
| Could measurement or ascertainment of the outcome have differed between intervention groups? |  | N |
| Risk of bias in selection of the reported result | Were the data that produced this result analysed in accordance with a pre-specified analysis plan that was finalized before unblinded outcome data were available for analysis? |  | Y |  |
| Overall risk of bias | | | | |

Note:- risk of bias was assessed for each domain and the overall risk of bias judged from the risk of bias of each domain. Low risk of bias implies the trial is judged to be at low risk of bias for all domains.

Risk of bias assessment for cohort study

| Domain |  | Total | Risk of bias | Quality |
| --- | --- | --- | --- | --- |
| Selection | 1. Representativeness of the exposed cohort |  |  |  |
| 1. Selection of the non-exposed cohort |  |  |  |
| 1. Ascertainment of exposure |  |  |  |
| 1. Demonstration that outcome of interest was not present at start of study |  |  |  |
| Comparability | Comparability of cohorts on the basis of the design or analysis |  |  |  |
| Outcome | 1. Assessment of outcome |  |  |  |
| 1. Was follow-up long enough for outcomes to occur |  |  |  |
| 1. Adequacy of follow up of cohorts |  |  |  |
| Total |  |  |  |  |

Note: A study awarded a maximum of one star for each numbered item within the selection and outcome categories. A maximum of two stars was given for comparability. Studies scoring seven and more were considered having low risk of bias.

**Table S4 Data Extraction Form**

**Title of the systematic review: The impact of first-line anti-tubercular drugs’ pharmacokinetics on treatment outcome: a systematic review**

**Registration no:**  CRD42019138544

**Notes on using this data extraction form:**

- Be consistent in the order and style you use to describe the information for each included study
- One copy of this form is used only to extract data from one study paper

1. **General Information**

| - 1. Date form completed *(dd/mm/yyyy)* |  |
| --- | --- |
| 1. Name or ID of person extracting data |  |
| 1. Report title (title of paper/abstract/ report that are data extracted from |  |
| 1. Author's name and email address |  |
| 1. Publication type ( full report, abstract, others) |  |
| 1. Year of publication |  |
| 1. Country in which the study conducted |  |
| 1. Language |  |
| 1. Study funding source |  |
| 1. Possible conflict of interest (for study authors) |  |
| 1. Notes |  |

2. Eligibility

| Study characteristics | Review inclusion criteria | Location in the text |
| --- | --- | --- |
| Type of the study (prospective cohort, clinical trial,) |  |  |
| Type of publication ( journal article, conference paper) |  |  |
| Study participant (tuberculosis patients treated with standard dose of first line drugs) |  |  |
| Focused drug WHO standard dose of (isoniazid, rifampicin, ethambutol, pyrazinamide) |  |  |
| Focused disease (tuberculosis) |  |  |
| Types of outcome (cure, relapse, failed, culture conversion, smear conversion) |  |  |
| Pharmacokinetics report (Cmax, AUC or Cmax/MIC, AUC/MIC) |  |  |
| Decision to include or exclude |  |  |
| Note |  |  |

**3. Exclusion of the study**

If the identified study fulfils any of the following exclude it and do not proceed to the next activity

| Reason for the exclusion | Tick any applicable |
| --- | --- |
| 1. Abstract only |  |
| 1. Systematic review |  |
| 1. Retrospective study |  |
| 1. Missing information |  |
| 1. Studies using dose other than WHO recommendation |  |
| 1. If both pharmacokinetics and treatment outcome are not reported |  |
| 1. If any drug other than first line used |  |
| 1. Duplicated studies |  |
| 1. Failed participant Criteria |  |
| 1. Other |  |
| 1. If other, specify |  |

**If the above criteria are all fulfilled proceed to the following information extraction**

3. Participant characteristics

| characteristics | | Description | | | | | Location in the text and comment |
| --- | --- | --- | --- | --- | --- | --- | --- |
| Age | | Mean | SD | | Median | IQR |  |
|  |  | |  |  |
| Sex |  | Number | | Percent | | |  |
| Male |  | |  | | |
| Female |

4. General characteristics of the study

| characteristics | Description | Location in the text |
| --- | --- | --- |
|  |  |  |
| Design (cohort, controlled clinical trial..) |  |  |
| Explain how patients were selected |  |  |
| Study period |  |  |
| Study setting/country |  |  |
| Sample size |  |  |
| Duration for which the study participant followed |  |  |
| How TB treatment outcome defined in the study |  |  |
| Bioanalytical methods used for determination of the drug concentration |  |  |
| PK sampling time point (hours after the drug ingested) |  |  |
| PK parameter used (AUC, Cmax) |  |  |

5. Result and finding of the study

5.1. Basic characteristics of the study

| Characteristics | Description | Location in the text |
| --- | --- | --- |
| Median/ mean age |  |  |
| Median/mean body weight |  |  |
| Number of participants with both PK and treatment outcome reported |  |  |
| Number of participants with tuberculosis only |  |  |
| Number of participants with TB and HIV comorbidities |  |  |
| Number of participants with TB and diabetes comorbidities |  |  |

5.2. Pharmacokinetics and treatment outcomes results

| Plasma concentration | | Rifampicin | | Cmax |  |  |
| --- | --- | --- | --- | --- | --- | --- |
|  | | Isoniazid | | Cmax |  |  |
|  | | Pyrazinamide | | Cmax |  |  |
|  | | Ethambutol | | Cmax |  |  |
| AUC | | Rifampicin | | Average |  |  |
|  | | Isoniazid | | Average |  |  |
|  | | Pyrazinamide | | Average |  |  |
|  | | Ethambutol | | Average |  |  |
| Proportion of patients with low Cmax and/or AUC | | Rifampicin | |  |  |  |
| Isoniazid | |  |  |  |
| Pyrazinamide | |  |  |  |
| Ethambutol | |  |  |  |
| AUC correlated with treatment outcome | | | | |  |  |
| Other factors which affect treatment outcome considered in the study | | | | |  |  |
| **Treatment outcome reported** | | | | | | |
| Microbiological result (culture conversion, smear conversion) | Smear conversion | | Time to smear conversion | |  |  |
|  | |  |  |
| Culture conversion | | Time to culture conversion | |  |  |
|  | |  |  |
| Treatment outcome WHO  Defined after 6 months | Cured | | | |  |  |
| Failed | | | |  |  |
| Default | | | |  |  |
| Death | | | |  |  |
| Lost to follow | | | |  |  |
| Any other report indicating treatment outcome | Time at which response observed after treatment completion | | | |  |  |
| Observed treatment response | | | |  |  |
| Proportion of patients with poor treatment outcome |  | | | |  |  |

| Limitation | Description | Locations in the text |
| --- | --- | --- |
| Strength |  |  |
| Limitation |  |  |
| Strategy to overcome limitations |  |  |
| Note |  |  |

Limitation of the study

Conclusion and other information

|  | Description | Locations in the text |
| --- | --- | --- |
| Key conclusions of the study |  |  |
| Notes |  | |
